# Supplementary material for: CENPT bridges adjacent CENPA nucleosomes on young human α-satellite dimers
Source: PubMed Central journal article supplement — Genome Res. 2016 Sep;26(9):1178–87. doi: 10.1101/gr.204784.116 (PMC5052034; doi:10.1101/gr.204784.116), 2016-09
Supplement: supp_gr.204784.116_Supplemental_Information.pdf [file supp_gr.204784.116_Supplemental_Information.pdf]

## Supplemental information

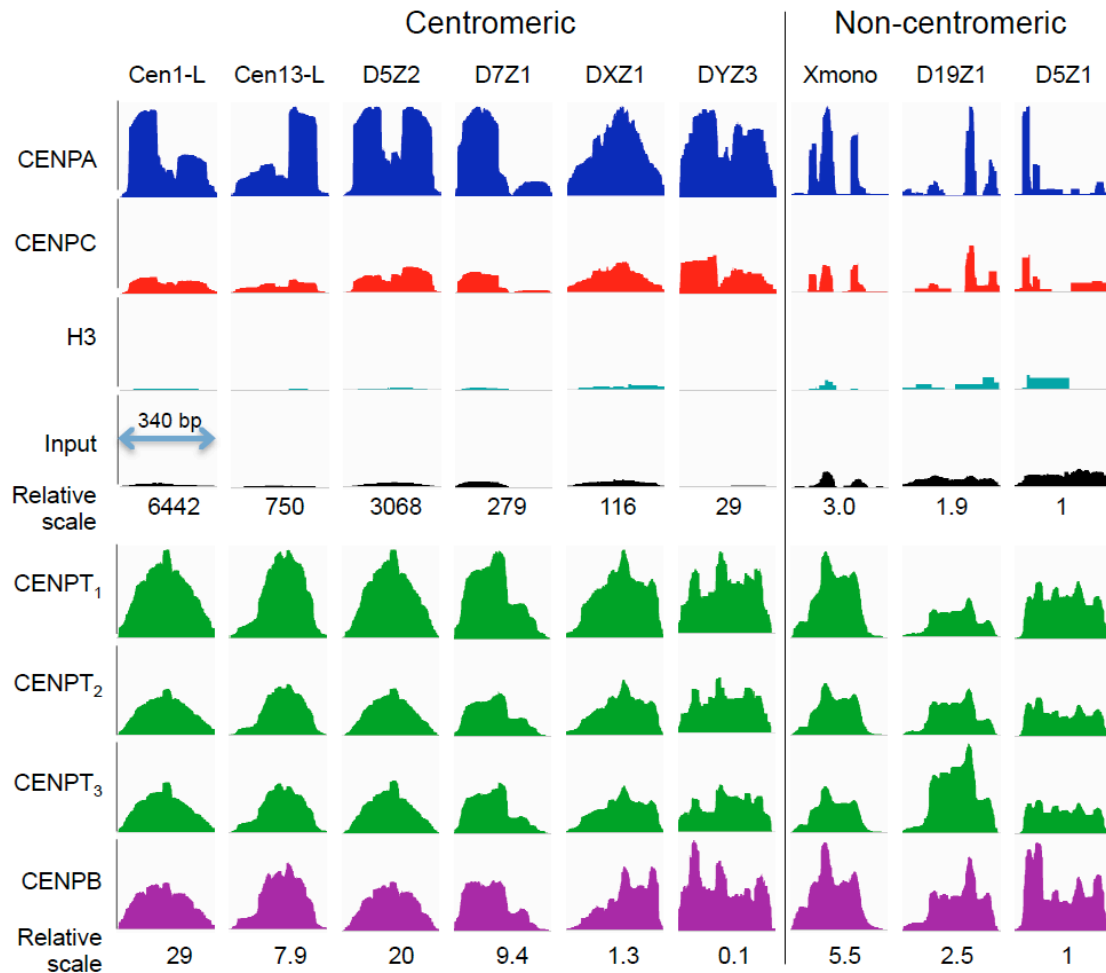

**Supplemental Fig. S1. CENPT is not recovered under native conditions.** N-ChIP-seq merged pairs for CENPA, CENPT, H3 and Input (top, from GEO GSE60951 (Henikoff et al. 2015) and paired-end reads for 3 biological replicates of CENPT (bottom) were mapped to the indicated 340-bp  $\alpha$ -satellite dimers. Each column of four profiles is scaled to the maximum peak. The relative scale is the area of the CENPA, CENPC or H3 profile (top) or the CENPT<sub>1</sub>, CENPT<sub>2</sub> or CENPT<sub>3</sub> profile (bottom) divided by the area of the D5Z1 profile, where the numbers reflect the product of the total sequence abundance times the enrichment.

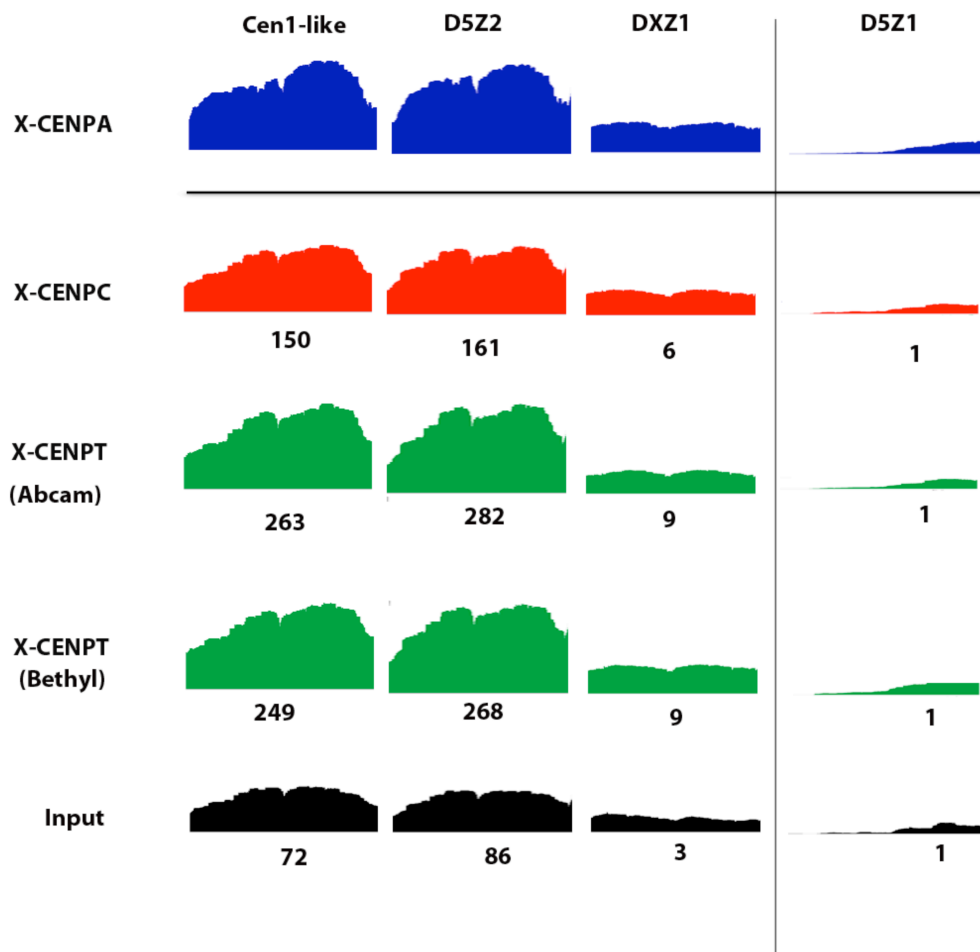

**Supplemental Fig. S2. CENPA, CENP- C and CENPT are cross-linked to same  $\alpha$ -satellites.** The X-ChIP profiles of CENPT with two different antibodies (Abcam and Bethyl) on centromeric  $\alpha$ -satellites are highly similar to each other and to those of CENPA and CENPC.

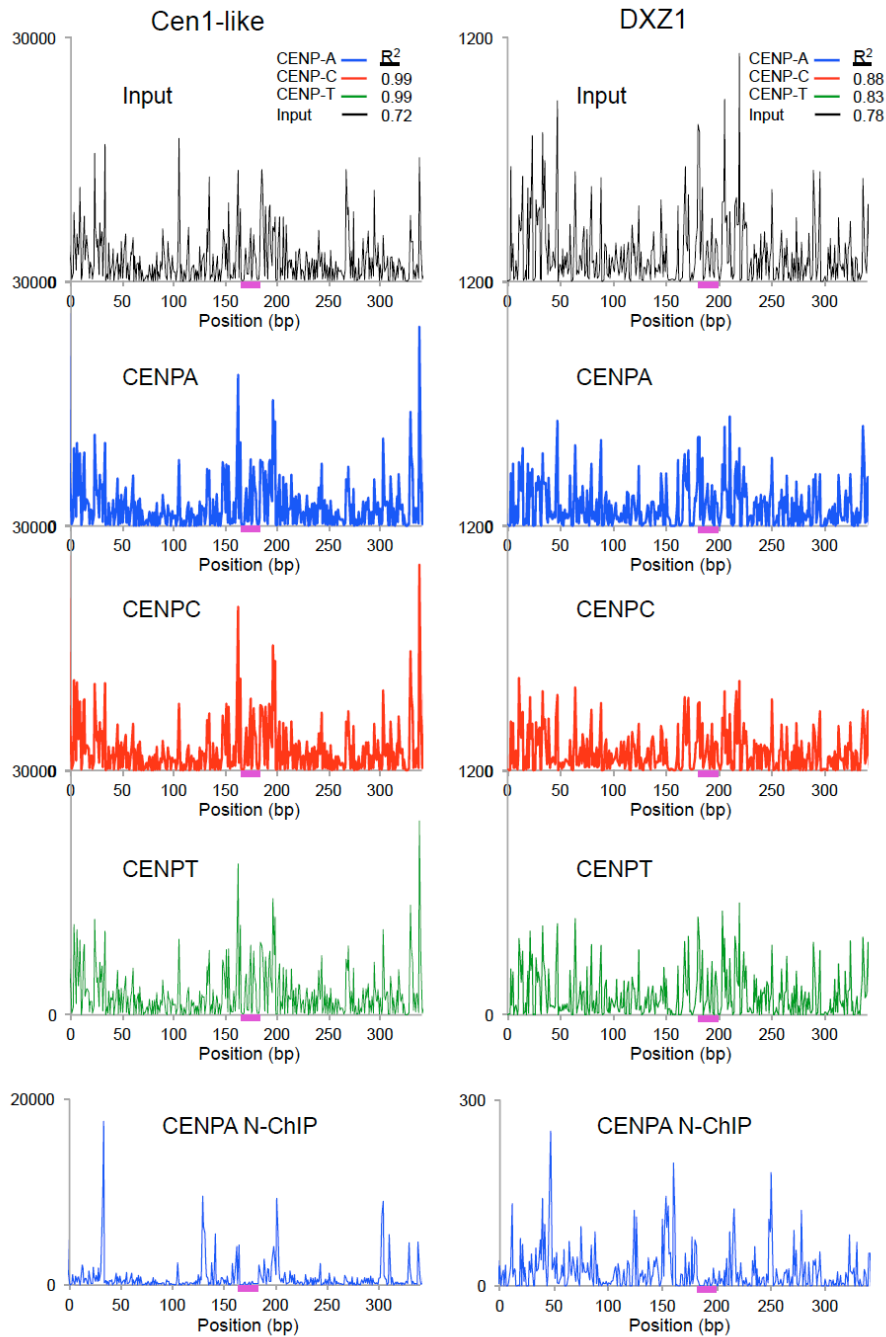

**Supplemental Fig. S3.** Fragment ends from X-ChIP (top four panels) and native (bottom panel) datasets were mapped to the Cen1-like consensus and DXZ1 sequences. The CENPB box region is indicated by the magenta box.

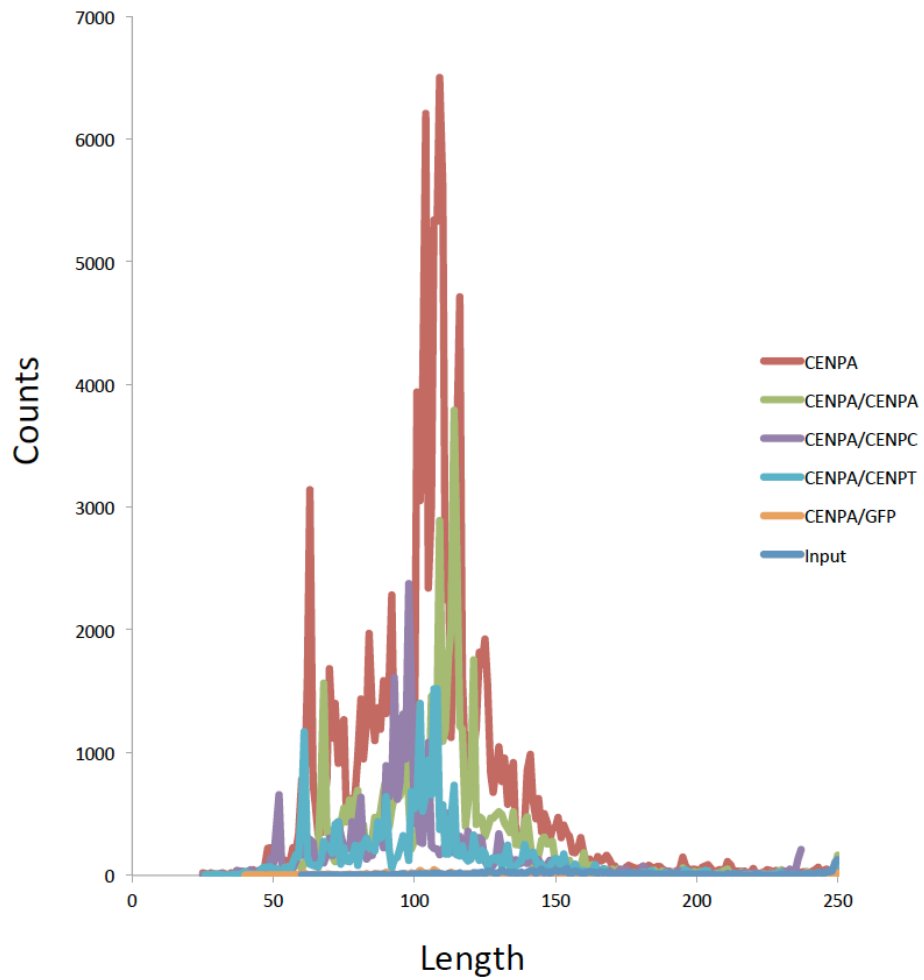

**Supplemental Fig. S4. Fragment length distribution of Sequential ChIP datasets on Cen1-like  $\alpha$ -satellites.**

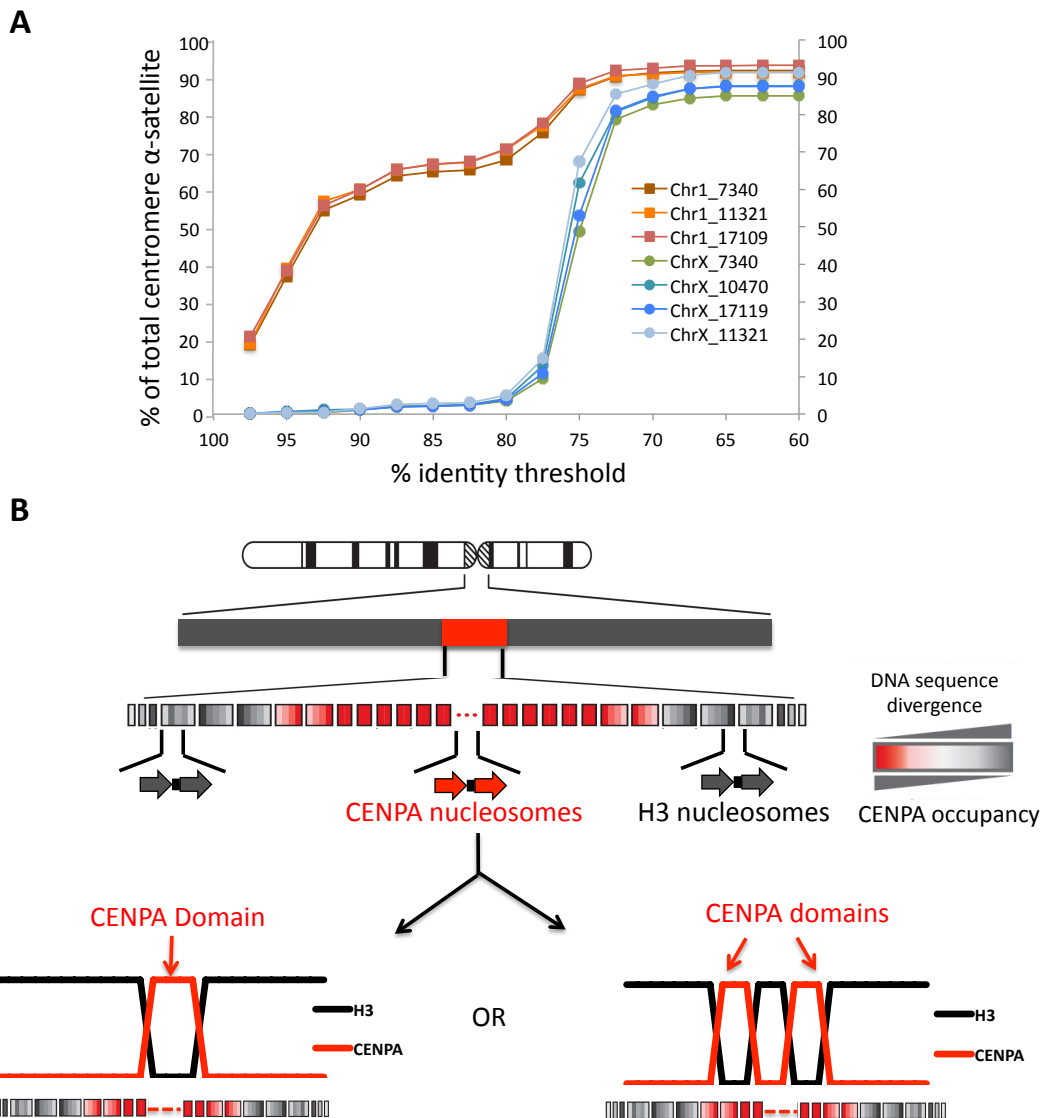

**Supplemental Fig. S5. A) Only a fraction of  $\alpha$ -satellites on chromosome 1 map with high identity to Cen1-like dimer.** BLASTn of Cen1-like 340-bp dimeric consensus sequence against the  $\alpha$ -satellite subset (identified using a Hidden Markov Model filter trained on  $\alpha$ -satellite) of Chromosome 1 flow sorted sequence libraries showed that  $\sim 20\%$  of the  $\alpha$ -satellites on Chromosome 1 is  $\geq 97.5\%$  identical to the Cen1-like consensus, gradually increasing to  $\sim 65\%$  when the stringency is relaxed to  $\geq 80\%$  identical. In contrast, only  $\sim 4\%$  of the X-chromosome  $\alpha$ -satellite is  $\geq 80\%$  identical to the Cen1-like 340-bp consensus sequence (Sivakanthan Kasinathan, personal communication). **B) A model for CENPA and H3 occupancies on a typical human centromere.**

**Supplemental Table 1.** Primers used for qPCR in this study.

| Primer   | Sequence                 |
|----------|--------------------------|
| S1-F     | AGGGAATGTCTTCCCATAAAAACT |
| S1R      | GTCTACCTTTTATTTGAATTCCCG |
| S2F      | TTTTTGTGCAATTGGCAAATGGAG |
| S2R      | AGACTGTTTCCTCACTGCTCT    |
| S3F      | CAGCAGCATCCTCAGAACTT     |
| S3R      | CTCCACTTGCAAATTCCACA     |
| 5SDNA-F1 | CCGGACCCCAAAGGCGCACGCTGG |
| 5SDNA-R1 | TGGCTGGCGTCTGTGGCACCCGCT |

### **Supplemental References**

Henikoff JG, Thakur J, Kasinathan S, Henikoff S. 2015. A unique chromatin complex occupies young alpha-satellite arrays of human centromeres. *Science advances* 1: e14000234.
